# Supplementary material
Source: PubMed Central journal article supplement (PMC5026312)
Supplement: NIHMS809151-supplement-Supplement1.pdf [file NIHMS809151-supplement-Supplement1.pdf]

## Supplementary Appendix

This appendix has been provided by the authors to give readers additional information about their work.

Supplement to: Nelson DA, Deuster PA, Carter R III, Hill OT, Wolcott VL, Kurina LM. Sickle cell trait, rhabdomyolysis, and mortality among U.S. army soldiers. *N Engl J Med* 2016;375:435-42. DOI: 10.1056/NEJMoa1516257

## Supplementary Appendix

| <b>Table of Contents</b>                                                                                                                     | <b>Page</b> |
|----------------------------------------------------------------------------------------------------------------------------------------------|-------------|
| List of investigators                                                                                                                        | 2           |
| Table S1. Methods employed by the U.S. Army to prevent exertional collapse events, including heat injury and rhabdomyolysis, during training | 3           |
| References                                                                                                                                   | 5           |

## **List of Investigators**

D. Alan Nelson, Ph.D.; U.S. Army Office of the Surgeon General

Patricia A. Deuster, Ph.D.; Consortium for Health and Military Performance, A DoD Center of Excellence; Department of Military and Emergency Medicine; Uniformed Services University

Robert Carter III, Ph.D.; U.S. Army Research Institute of Surgical Research, Fort Sam Houston & Department of Emergency Medicine, University of Texas Health Science Center at San Antonio

O. Hill, Ph.D.; Extremity Trauma and Amputation Center of Excellence, Center for the Intrepid, Brooke Army Medical Center

Vickee L. Wolcott, Ph.D.; Army-Baylor University Graduate Program in Health and Business Administration

Lianne M. Kurina, Ph.D.; Department of Medicine, Division of Primary, Preventive, and Community Medicine, Stanford University School of Medicine; 450 Serra Mall, Bldg 20, Stanford, CA 94305-2160; (650) 725-7531; [lkurina@stanford.edu](mailto:lkurina@stanford.edu)  
(corresponding author)

**Table S1.** Methods employed by the US Army to prevent exertional collapse events during training, including heat injury and rhabdomyolysis.

| <b>Leader, clinician and individual prevention measures<sup>1</sup></b>                                                                                                                                                                                                                                                                                                                                                                                                                                                                                                                                                                                                                                                                                                                                   |
|-----------------------------------------------------------------------------------------------------------------------------------------------------------------------------------------------------------------------------------------------------------------------------------------------------------------------------------------------------------------------------------------------------------------------------------------------------------------------------------------------------------------------------------------------------------------------------------------------------------------------------------------------------------------------------------------------------------------------------------------------------------------------------------------------------------|
| <p><i>Identify and assess hazards</i></p> <ul style="list-style-type: none"> <li>• Check the recent and anticipated environmental conditions and associated heat stress levels, and determine unique group and individual risk factors</li> <li>• Use the "HEAT" acronym:               <ul style="list-style-type: none"> <li>○ <u>H</u>eat levels and associated risk</li> <li>○ <u>E</u>xertion levels planned</li> <li>○ <u>A</u>cclimation level of those present for training</li> <li>○ <u>T</u>ime factors including duration of activity and recovery time</li> </ul> </li> </ul>                                                                                                                                                                                                                |
| <p><i>Develop and implement risk controls</i></p> <ul style="list-style-type: none"> <li>• Plan training in advance and estimate the risk of collapse events</li> <li>• Consider the environment and training event characteristics:               <ul style="list-style-type: none"> <li>○ Training event characteristics</li> <li>○ Uniform and equipment needed</li> <li>○ Location and time of day of key activities</li> </ul> </li> <li>• Adjust activity distances, durations, pace, and loads and emplace work/rest cycles               <ul style="list-style-type: none"> <li>○ Conduct high-intensity training in cooler morning hours</li> <li>○ Ensure no consecutive days of high-intensity activity</li> </ul> </li> <li>• Ensure proper resources are at appropriate locations</li> </ul> |

- Equipment for checking Wet Globe Bulb Temperatures
- Water, snacks and electrolyte beverages
- Medical resources and locations, and relevant communication capabilities
- Establish standard operating procedures, and train and test soldiers on them
- Identify how to monitor hydration & high risk personnel

*Supervise and evaluate*

- Ensure implantation of all planned measures
- Check junior leaders for knowledge of the prevention program
- Check medical resources (e.g., equipment, communications)
- Stop training if an injury occurs and re-assess the total unit status

**Further clinician actions<sup>2</sup>**

- Screen and defer individuals seeking entry to military service for histories of prior recurrent or severe exertional collapse
- Emplace protective duty restrictions for individuals with such histories
- Refer soldiers with such histories for review for possible discharge from service

## References

1. U.S. Army Medical Department, Army Public Health Center. Heat illness prevention. 2016.  
(<https://phc.amedd.army.mil/topics/discond/hipss/pages/heatinjuryprevention.aspx>)
2. Department of the Army. Army Regulation 40-501: Standards of Medical Fitness. 2011 ([http://armypubs.army.mil/epubs/pdf/r40\\_501.pdf](http://armypubs.army.mil/epubs/pdf/r40_501.pdf))
